# Supplementary material for: Microbial communities affecting albumen photography heritage: a methodological survey
Source: PubMed Central journal article supplement (PMC4749957; doi:10.1038/srep20810), 2016-02-11
Supplement: srep20810-s1.pdf [file srep20810-s1.pdf]

## Supplementary Information

### **Microbial communities affecting albumen photography heritage: a methodological survey**

Andrea Puškárová<sup>1</sup>, Mária Bučková<sup>1</sup>, Božena Habalová<sup>2</sup>, Lucia Kraková<sup>1</sup>, Alena Maková<sup>2</sup>,  
Domenico Pangallo<sup>1, 3, \*</sup>

<sup>1</sup> Institute of Molecular Biology, Slovak Academy of Sciences, Dúbravská cesta 21, 84551  
Bratislava, Slovakia

<sup>2</sup> Slovak National Archives, Department of Archival Preservation, Drotárska cesta 42, 84005  
Bratislava, Slovakia

<sup>3</sup> Caravella, Ltd., Tupolevova 2, 85101 Bratislava, Slovakia

\* Corresponding author

e-mail: domenico.pangallo@savba.sk; Tel.: 00421 2 59307443

**Table S1.** List of band assignments according to Kansiz *et al.* (1999).

| <b>Wavenumber (cm<sup>-1</sup>)</b> | <b>Functional group(s)</b> | <b>Proposed band assignment</b>                     |
|-------------------------------------|----------------------------|-----------------------------------------------------|
| <b>1736</b>                         | $\nu$ C=O                  | Aliphatic aldehydes, conjugated carbonyl structures |
| <b>1406</b>                         | $\nu$ OC–OH                | Carboxylic acid                                     |
| <b>1362, 1319</b>                   | $\nu$ C–OH                 | Alcohols                                            |
| <b>1286</b>                         | $\nu$ C–O                  | Carboxylic acid                                     |
| <b>1231-900</b>                     | $\nu$ C–O–C                | Polysaccharides                                     |

Kansiz, M. *et al.* Fourier Transform Infrared microspectroscopy and chemometrics as a tool for the discrimination of cyanobacterial strains. *Phytochemistry* **52**, 407-417 (1999).

**Table S2.** Bacterial and fungal clones detected on the albumen photographs and the album paper frame.

| Sample of isolation                                                                                         | Clones identified based on the highest 16S and 28S rDNA similarity scores                                                   | Percentage of detection | Accession Number      |
|-------------------------------------------------------------------------------------------------------------|-----------------------------------------------------------------------------------------------------------------------------|-------------------------|-----------------------|
| <b>Gyula Albumen photograph</b>                                                                             | <b>Bacteria</b>                                                                                                             |                         |                       |
|                                                                                                             | JN871595 <i>Geobacillus thermoleovorans</i> 665/667 (99%)                                                                   | 35%                     | KT200278              |
|                                                                                                             | EU407552 <i>Bacillus pumilus</i> 657/660 (99%)                                                                              | 9%                      | KT200279              |
|                                                                                                             | CP000557 <i>Geobacillus thermodenitrificans</i> 662/666 (99%)                                                               | 20%                     | KT200281              |
|                                                                                                             | CP006254 <i>Geobacillus</i> sp. 662/667 (99%)                                                                               | 6%                      | KT200282              |
|                                                                                                             | CP006579 <i>Aeromonas hydrophila</i> 657/659 (99%)                                                                          | 11%                     | KT200283              |
|                                                                                                             | KP229551 <i>Geobacillus</i> sp. 582/594 (98%)                                                                               | 13%                     | KT200284              |
|                                                                                                             | HQ757881 Uncultured bacterial clone 658/660 (99%) / NR_074931 <i>Geobacillus thermoleovorans</i> 657/660 (99%) <sup>a</sup> | 6%                      | KT200285              |
|                                                                                                             | <b>Eukaryotes</b>                                                                                                           |                         |                       |
|                                                                                                             | JQ807931 <i>Nectria</i> sp. 563/563 (100%)                                                                                  | 31%                     | KT200297;<br>KT200303 |
|                                                                                                             | KC425289 <i>Chaetomium globosum</i> 559/560 (99%)                                                                           | 10%                     | KT200298              |
|                                                                                                             | KM521834 <i>Cladosporium ramotenellum</i> 565/565 (100%)                                                                    | 16%                     | KT200299              |
|                                                                                                             | EU034632 <i>Saccharomyces servazzii</i> 562/572 (98%)                                                                       | 5%                      | KT200300              |
|                                                                                                             | AF075520 <i>Trichosporon aquatile</i> 596/596 (100%)                                                                        | 10%                     | KT200301              |
|                                                                                                             | FJ432593 <i>Geotrichum</i> sp. 540/545 (99%)                                                                                | 16%                     | KT200302              |
| AY464871 Uncultured fungus clone 564/573 (98%) / KJ170228 <i>Corynespora</i> sp. 562/572 (98%) <sup>b</sup> | 2%                                                                                                                          | KT200304                |                       |
| KJ847249 <i>Malassezia</i> sp. 598/599 (99%)                                                                | 10%                                                                                                                         | KT200305                |                       |
| <b>Gyula Album paper frame</b>                                                                              | <b>Bacteria</b>                                                                                                             |                         |                       |
|                                                                                                             | CP006579 <i>Aeromonas hydrophila</i> 659/659 (100%)                                                                         | 11%                     | KT200286              |
|                                                                                                             | CP006254 <i>Geobacillus</i> sp. 659/667 (99%)                                                                               | 16%                     | KT200287              |
|                                                                                                             | CP010816 <i>Escherichia coli</i> 655/657 (99%)                                                                              | 4%                      | KT200288              |
|                                                                                                             | JN871595 <i>Geobacillus thermoleovorans</i> 665/667 (99%)                                                                   | 40%                     | KT200280              |
|                                                                                                             | KC252984 <i>Geobacillus kaustophilus</i> 664/667 (99%)                                                                      | 20%                     | KT200290              |

|                               |                                                                                                                             |     |          |
|-------------------------------|-----------------------------------------------------------------------------------------------------------------------------|-----|----------|
|                               | GQ061009 Uncultured bacterium clone 633/633 (100%) / NR_042138 <i>Corynebacterium macginleyi</i> 630/633 (99%) <sup>a</sup> | 9%  | KT200291 |
|                               | <b>Eukaryotes</b>                                                                                                           |     |          |
|                               | JQ807931 <i>Nectria</i> sp. 562/563 (99%)                                                                                   | 49% | KT200306 |
|                               | KJ847249 <i>Malassezia</i> sp. 599/599 (100%)                                                                               | 16% | KT200307 |
|                               | HM014472 <i>Malassezia</i> sp. 595/598 (99%)                                                                                | 20% | KT200308 |
|                               | JN974267 <i>Galactomyces candidum</i> 543/545 (99%)                                                                         | 15% | KT200309 |
|                               | <b>Bacteria</b>                                                                                                             |     |          |
|                               | JQ404482 <i>Shigella</i> sp. 628/629 (99%)                                                                                  | 10% | KT200292 |
|                               | AY550102 <i>Geobacillus thermoleovorans</i> 667/667 (100%)                                                                  | 13% | KT200289 |
|                               | JN411418 <i>Staphylococcus succinus</i> 663/664 (99%)                                                                       | 10% | KT200293 |
|                               | KM975639 <i>Lactococcus lactis</i> 661/663 (99%)                                                                            | 23% | KT200294 |
|                               | KJ531396 <i>Lactococcus lactis</i> subsp. <i>cremoris</i> 661/663 (99%)                                                     | 25% | KT200295 |
|                               | KC252984 <i>Geobacillus kaustophilus</i> 663/667 (99%)                                                                      | 19% | KT200296 |
| <b>Antiquarian photograph</b> | <b>Eukaryotes</b>                                                                                                           |     |          |
|                               | EF652440 <i>Aspergillus</i> sp. 571/571 (100%)                                                                              | 19% | KT200310 |
|                               | EF652088 <i>Eurotium halophilicum</i> 571/572 (99%)                                                                         | 22% | KT200311 |
|                               | U81264 <i>Aspergillus penicillioides</i> 570/571 (99%)                                                                      | 19% | KT200312 |
|                               | KC288123 <i>Alternaria</i> sp. 570/571 (99%)                                                                                | 10% | KT200313 |
|                               | AY818962 <i>Gnomonia setacea</i> 562/562 (100%)                                                                             | 12% | KT200314 |
|                               | KM458634 <i>Cladosporium</i> sp. 565/565 (100%)                                                                             | 8%  | KT200315 |
|                               | Z95383 <i>Trebouxia impressa</i> 561/565 (99%)                                                                              | 10% | KT200316 |

a) The BLAST search was also performed using the specific 16S rRNA database for bacteria and archaea.

b) The BLAST search was also performed excluding the Uncultured/environmental sample sequences.

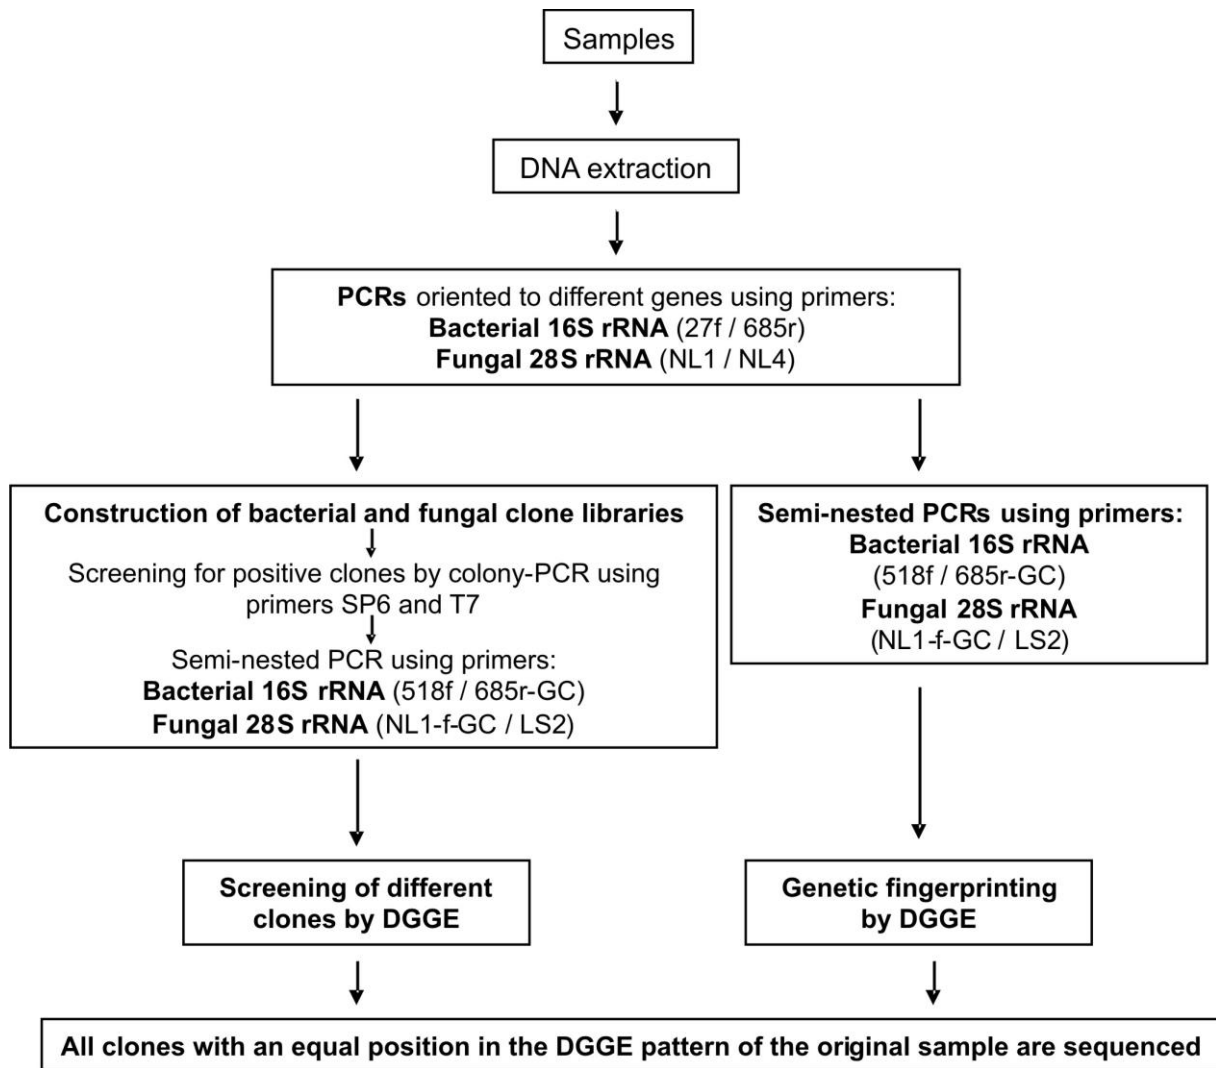

**Fig. S1.** Schematic diagram of the experimental procedure to analyze the microbial communities' diversity using the DGGE-cloning strategy.
